# Supplementary material for: Natural and synthetic inhibitors of a phage-encoded quorum-sensing receptor affect phage–host dynamics in mixed bacterial communities
Source: PubMed Central journal article supplement (PMC9894119; doi:10.1073/pnas.2217813119), 2022-11-29
Supplement: pnas.2217813119.sapp.pdf [file pnas.2217813119.sapp.pdf]

## Supporting Information for

# Natural and synthetic inhibitors of a phage-encoded quorum-sensing receptor affect phage-host dynamics in mixed bacterial communities

Justin E. Silpe<sup>1,2,3</sup>, Olivia P. Duddy<sup>1,3</sup>, and Bonnie L. Bassler<sup>1,2,\*</sup>

1 Department of Molecular Biology, Princeton University, Princeton, NJ, USA

2 Howard Hughes Medical Institute, Chevy Chase, MD, USA

3 These authors contributed equally

### Contents: Item | Description

**Supplementary Figure S1.** The ARM81 *ahyl* gene encodes the C4-HSL-producing synthase

*Ahyl* and both C4-HSL and C8-HSL solubilize  $LUXR_{ARM81d}$ .

**Supplementary Table S1.** Strains used in this study.

**Supplementary Table S2.** Primers used in this study.

**Supplementary Table S3.** Plasmids used in this study.

**Figure S1**

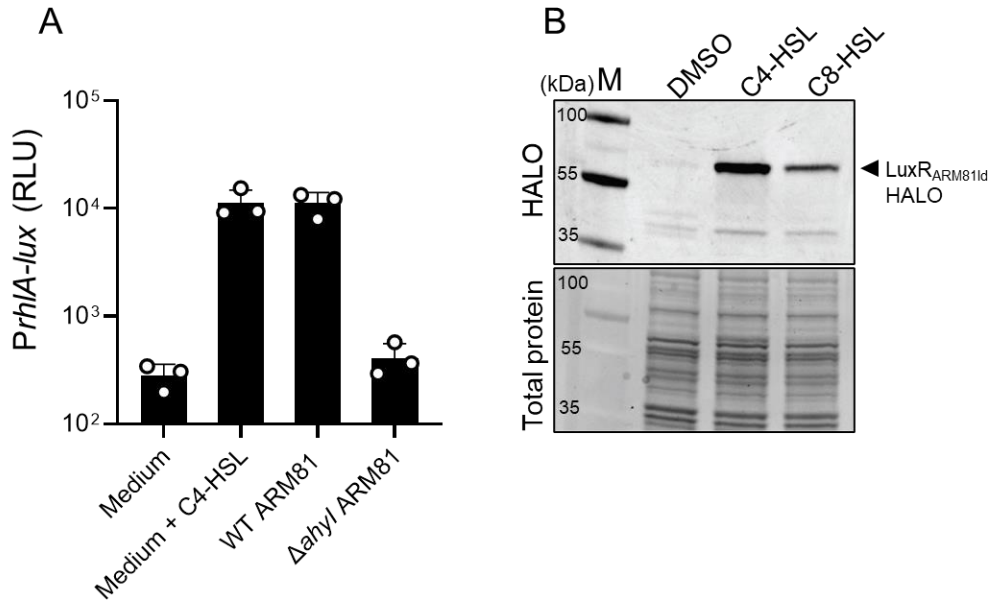

**Figure S1. The ARM81 *ahyl* gene encodes the C4-HSL-producing synthase Ahyl and both C4-HSL and C8-HSL solubilize LuxR<sub>ARM81d</sub>.**

(A) *PrhIA-lux* expression from *E. coli* grown in medium supplemented with C4-HSL, cell-free culture fluids from WT *Aeromonas* sp. ARM81 (C4-HSL<sup>+</sup>), or cell-free culture fluids from Δ*ahyl* *Aeromonas* sp. ARM81 (C4-HSL<sup>-</sup>). The *E. coli* strain carries a plasmid with *PrhIA-lux* and a second plasmid with arabinose-inducible pBAD-*rhIR*. The *rhIA* promoter and *rhIR* gene both come from *P. aeruginosa*. In this system, RhIR only activates *PrhIA-lux* expression when C4-HSL is supplied exogenously. All media contained 0.1% arabinose.

(B) Western blot (top) and total protein (bottom) showing LuxR<sub>ARM81d</sub>-HALO in the soluble fractions of *E. coli* supplied with 75 μM of the indicated HSL or an equivalent volume of DMSO. Detection of the HALO-reactive fluorophore requires that the HALO tag be properly folded. Thus, LuxR<sub>ARM81d</sub>-HALO band intensity is a measure of folded LuxR<sub>ARM81d</sub> in the soluble fraction of each sample. M denotes molecular weight marker (representative bands are labeled). kDa is kilodalton.

**Table S1. Strains used in this study.**

| Strain                                   | Genotype                                                                                                                                                                                                                                                                        | Reference                     |
|------------------------------------------|---------------------------------------------------------------------------------------------------------------------------------------------------------------------------------------------------------------------------------------------------------------------------------|-------------------------------|
| <i>E. coli</i> TOP10                     | F- <i>mcrA</i> $\Delta$ ( <i>mrr-hsdRMS-mcrBC</i> )<br>$\phi$ 80 <i>lacZ</i> $\Delta$ M15 $\Delta$ <i>lacX74</i> <i>recA1</i> <i>araD139</i><br>$\Delta$ ( <i>ara-leu</i> )7697 <i>galU</i> <i>galK</i><br>$\lambda$ - <i>rpsL</i> (Str <sup>R</sup> ) <i>endA1</i> <i>nupG</i> | Invitrogen                    |
| <i>E. coli</i> BL21                      | <i>fhuA2</i> [ <i>lon</i> ] <i>ompT</i> <i>gal</i> [ <i>dcm</i> ] $\Delta$ <i>hsdS</i>                                                                                                                                                                                          | Invitrogen                    |
| <i>Aeromonas</i> sp. ARM81<br>(JSS-3155) | WT                                                                                                                                                                                                                                                                              | (Dziewit and Radlinska, 2016) |
| <i>Aeromonas</i> sp. ARM81<br>(JSS-3388) | $\Delta$ <i>ahyl</i>                                                                                                                                                                                                                                                            | This study                    |
| <i>Vibrio fischeri</i> ES114             | WT                                                                                                                                                                                                                                                                              | Bassler lab strain collection |
|                                          | $\Delta$ <i>luxI</i>                                                                                                                                                                                                                                                            | Bassler lab strain collection |
|                                          | $\Delta$ <i>ainS</i>                                                                                                                                                                                                                                                            | Bassler lab strain collection |
|                                          | $\Delta$ <i>luxI</i> $\Delta$ <i>ainS</i>                                                                                                                                                                                                                                       | Bassler lab strain collection |

**Table S2. Primers used in this study.**

| Name     | Sequence (5 - 3)                               | Purpose; Template                                                                                        |
|----------|------------------------------------------------|----------------------------------------------------------------------------------------------------------|
| JSO-2192 | GTTTGCGGCCGCACGTTTTTACCCCC<br>CCAAAGCC         | <i>ahyI</i> upstream flanking DNA for insert into pFOG with NotI site; from <i>Aeromonas</i> sp. ARM81   |
| JSO-2193 | TTAACACTCTGTTATTACAAATGAGCA<br>AAAAAAGTCCCGGGA | <i>ahyI</i> upstream flanking DNA for insert into pFOG; from <i>Aeromonas</i> sp. ARM81                  |
| JSO-2194 | TTTGTAATAACAGAGTGTTAATT                        | <i>dhfr</i> cassette amplification; from EZ-DHFR Tn5                                                     |
| JSO-2195 | TTAATTAAGCCTGGCACAGCGG                         | <i>dhfr</i> cassette amplification; from EZ-DHFR Tn5                                                     |
| JSO-2196 | CGCTGTGCCAGGCTTAATTAACATTC<br>ATGCCTCTCCATTCA  | <i>ahyI</i> downstream flanking DNA for insert into pFOG; from <i>Aeromonas</i> sp. ARM81                |
| JSO-2197 | GTTTTGTTTAAACACATGGGGATGCG<br>TTCCTGTGA        | <i>ahyI</i> downstream flanking DNA for insert into pFOG with PmeI site; from <i>Aeromonas</i> sp. ARM81 |
| JSO-1566 | CATTAATTAACCTCCTGAATTCGGAA<br>GCGAT            | pT7 backbone amplification for Gibson assembly; pH6HTN plasmid                                           |
| JSO-2035 | TAATAGTCAACCGCTGAGCAATAACT<br>AGC              | pT7 backbone amplification for Gibson assembly; pH6HTN plasmid                                           |
| JSO-2176 | GCTTTGTATATGCCCCACCTA                          | qPCR; phage ARM81Id                                                                                      |
| JSO-2177 | GCAATCAGACATCAGTGCCAAG                         | qPCR; phage ARM81Id                                                                                      |
| JSO-2106 | CTTCTCTTCCGAGCGTTACGAC                         | qPCR; <i>Aeromonas</i> sp. ARM81 host ( <i>rpoB</i> )                                                    |
| JSO-2107 | GGTCGATATCGTCCACTTCGTC                         | qPCR; <i>Aeromonas</i> sp. ARM81 host ( <i>rpoB</i> )                                                    |

**Table S3. Plasmids used in this study.**

| <b>Plasmid name (informal)</b>                                      | <b>Strain ID (formal)</b> | <b>Relevant fragment</b>                                     | <b>Marker, Origin</b> | <b>Source</b>                |
|---------------------------------------------------------------------|---------------------------|--------------------------------------------------------------|-----------------------|------------------------------|
| pTetA- <i>xre</i> <sub>ARM81d</sub> - <i>luxR</i> <sub>ARM81d</sub> | JSS-3237                  | <i>xre</i> <sub>ARM81d</sub> - <i>luxR</i> <sub>ARM81d</sub> | Amp, pBR322           | (Silpe <i>et al.</i> , 2022) |
| pTetA- <i>xre</i> <sub>ARM81d</sub> - <i>luxR</i> <sub>ARM81d</sub> | JSS-3326                  | <i>xre</i> <sub>ARM81d</sub> - <i>luxR</i> <sub>ARM81d</sub> | Cm, p15A              | (Silpe <i>et al.</i> , 2022) |
| PsmORF <sub>ARM81d</sub> - <i>lux</i>                               | JSS-3235                  | PsmORF <sub>ARM81d</sub> - <i>lux</i>                        | Kan, p15A             | (Silpe <i>et al.</i> , 2022) |
| pFOG- $\Delta$ <i>ahyl::dhfr</i>                                    | JSS-3387                  | $\Delta$ <i>ahyl::dhfr</i>                                   | Gent, oriR6 $\kappa$  | This study                   |
| pH6HTC-pT7- <i>luxR</i> <sub>ARM81d</sub> -HALO-HIS                 | JSS-1868                  | <i>luxR</i> <sub>ARM81d</sub> -HALO-HIS                      | Amp, pBR322           | (Silpe and Bassler, 2019)    |
